# Supplementary material for: Machine learning–based risk stratification for early tracheotomy in geriatric intracerebral hemorrhage: model development and web deployment
Source: Research Square preprint supplement (doi:10.21203/rs.3.rs-8177019/v1), 2025-12-30
Supplement: Supplementary file 1 [file 5192fd0f052ae0596fe06c83.docx]

**Supplementary Table 1: Comparison of Baseline Performance Between Training and Validation Sets After Random Split**

| **GROUP** | **Non-TT** | **TT** | **Standardize diff.** | **P-value** |
| --- | --- | --- | --- | --- |
| **N=87** | **N=348** |  |  |
| **Age (year)** | 70.64 ± 5.26 | 71.64 ± 5.29 | 0.19 (-0.05, 0.42) | 0.077 |
| **Temperature (℃）** | 36.75 ± 0.50 | 36.68 ± 1.85 | 0.05 (-0.18, 0.29) | 0.518 |
| **Respiratory rate (times/minute)** | 19.06 ± 5.39 | 18.71 ± 4.94 | 0.07 (-0.17, 0.30) | 0.782 |
| **Heart rate (times/minute)** | 85.40 ± 17.36 | 83.25 ± 15.82 | 0.13 (-0.11, 0.36) | 0.246 |
| **Systolic blood pressure (mmHg)** | 161.79 ± 26.30 | 162.01 ± 24.80 | 0.01 (-0.23, 0.24) | 0.749 |
| **Diastolic blood pressure (mmHg)** | 89.69 ± 16.72 | 88.63 ± 15.23 | 0.07 (-0.17, 0.30) | 0.683 |
| **Glucose (mmol/L)** | 8.37 ± 2.99 | 7.82 ± 2.73 | 0.19 (-0.05, 0.43) | 0.103 |
| **Uric acid (umol/L)** | 275.72 ± 100.64 | 282.19 ± 121.35 | 0.06 (-0.18, 0.29) | 0.948 |
| **Potassium (mmol/L)** | 3.63 ± 0.53 | 3.67 ± 0.48 | 0.07 (-0.16, 0.31) | 0.339 |
| **Sodium (mmol/L)** | 138.39 ± 4.74 | 138.54 ± 4.02 | 0.03 (-0.20, 0.27) | 0.709 |
| **Calcium (mmol/L)** | 2.28 ± 0.18 | 2.27 ± 0.18 | 0.07 (-0.17, 0.30) | 0.64 |
| **Phosphorus (mmol/L)** | 0.89 ± 0.26 | 0.91 ± 0.32 | 0.08 (-0.16, 0.31) | 0.62 |
| **Magnesium (mmol/L)** | 0.86 ± 0.12 | 0.86 ± 0.13 | 0.05 (-0.18, 0.29) | 0.507 |
| **Total protein (g/L)** | 70.79 ± 9.38 | 69.92 ± 7.86 | 0.10 (-0.14, 0.33) | 0.52 |
| **Albumin (g/L)** | 39.11 ± 4.47 | 39.18 ± 4.48 | 0.02 (-0.22, 0.25) | 0.952 |
| **White blood cell (109/L)** | 10.31 ± 4.06 | 10.03 ± 4.85 | 0.06 (-0.17, 0.30) | 0.43 |
| **Neutrophil (109/L)** | 8.65 ± 3.80 | 8.24 ± 4.75 | 0.10 (-0.14, 0.33) | 0.146 |
| **Lymphocyte (109/L)** | 1.12 ± 0.69 | 1.20 ± 0.74 | 0.12 (-0.12, 0.35) | 0.337 |
| **Monocyte count (109/L)** | 0.42 ± 0.23 | 0.53 ± 0.32 | 0.38 (0.15, 0.62) | 0.011 |
| **Hemoglobin (g/L)** | 141.86 ± 20.20 | 141.60 ± 23.13 | 0.01 (-0.22, 0.25) | 0.683 |
| **Platelet (109/L)** | 186.59 ± 67.81 | 192.14 ± 90.42 | 0.07 (-0.17, 0.30) | 0.959 |
| **Prothrombin time (s)** | 11.82 ± 2.22 | 12.61 ± 6.64 | 0.16 (-0.08, 0.39) | 0.088 |
| **International normalized ratio** | 1.02 ± 0.18 | 1.06 ± 0.35 | 0.15 (-0.09, 0.38) | 0.381 |
| **Activated partial thromboplastin time (s)** | 25.63 ± 6.01 | 26.54 ± 6.53 | 0.15 (-0.09, 0.38) | 0.269 |
| **Fibrinogen (g/L)** | 3.22 ± 1.14 | 3.19 ± 2.71 | 0.01 (-0.22, 0.25) | 0.462 |
| **Thrombin time (s)** | 16.60 ± 2.20 | 16.85 ± 2.20 | 0.11 (-0.12, 0.35) | 0.514 |
| 1. **dimer (mg/L)** | 2.60 ± 11.18 | 2.41 ± 9.69 | 0.02 (-0.22, 0.25) | 0.418 |
| **Midline shift (mm)** | 2.20 ± 3.62 | 2.35 ± 3.73 | 0.04 (-0.19, 0.28) | 0.691 |
| **Initial hematoma volume (mL)** | 25.44 ± 23.75 | 26.52 ± 22.36 | 0.05 (-0.19, 0.28) | 0.56 |
| **GCS** | 10.49 ± 3.30 | 10.51 ± 3.48 | 0.00 (-0.23, 0.24) | 0.873 |
| **Gender, (%)** |  |  | 0.11 (-0.13, 0.34) | 0.359 |
| **Female** | 42 (48.28%) | 149 (42.82%) |  |  |
| **Male** | 45 (51.72%) | 199 (57.18%) |  |  |
| **Hypertension, (%)** |  |  | 0.09 (-0.15, 0.32) | 0.448 |
| **No** | 26 (29.89%) | 90 (25.86%) |  |  |
| **Yes** | 61 (70.11%) | 258 (74.14%) |  |  |
| **Diabetes mellitus, (%)** |  |  | 0.08 (-0.15, 0.32) | 0.483 |
| **No** | 70 (80.46%) | 291 (83.62%) |  |  |
| **Yes** | 17 (19.54%) | 57 (16.38%) |  |  |
| **Smoking, (%)** |  |  | 0.00 (-0.23, 0.23) | 1 |
| **No** | 72 (82.76%) | 288 (82.76%) |  |  |
| **Yes** | 15 (17.24%) | 60 (17.24%) |  |  |
| **Alcohol consumption, (%)** |  |  | 0.19 (-0.05, 0.42) | 0.15 |
| **No** | 81 (93.10%) | 305 (87.64%) |  |  |
| **Yes** | 6 (6.90%) | 43 (12.36%) |  |  |
| **Anticoagulants, (%)** |  |  | 0.09 (-0.14, 0.33) | 0.45 |
| **No** | 81 (93.10%) | 315 (90.52%) |  |  |
| **Yes** | 6 (6.90%) | 33 (9.48%) |  |  |
| **Intraventricular hemorrhage, (%)** |  |  | 0.13 (-0.10, 0.37) | 0.534 |
| **No** | 51 (58.62%) | 225 (64.66%) |  |  |
| **Unilateral** | 30 (34.48%) | 99 (28.45%) |  |  |
| **Bilateral** | 6 (6.90%) | 24 (6.90%) |  |  |
| **Side of hematoma, (%)** |  |  | 0.14 (-0.09, 0.38) | 0.23 |
| **Left** | 37 (42.53%) | 173 (49.71%) |  |  |
| **Right** | 50 (57.47%) | 175 (50.29%) |  |  |
| **Lesion location, (%)** |  |  | 0.18 (-0.05, 0.42) | 0.771 |
| **Basal Ganglia** | 40 (45.98%) | 180 (51.72%) |  |  |
| **Lobar** | 17 (19.54%) | 68 (19.54%) |  |  |
| **Cerebellum** | 7 (8.05%) | 32 (9.20%) |  |  |
| **Brainstem** | 2 (2.30%) | 6 (1.72%) |  |  |
| **Other** | 6 (6.90%) | 22 (6.32%) |  |  |
| **Thalamus** | 15 (17.24%) | 40 (11.49%) |  |  |
| **CT signs, (%)** |  |  | 0.18 (-0.06, 0.41) | 0.669 |
| **No** | 64 (73.56%) | 248 (71.26%) |  |  |
| **Island Sign** | 4 (4.60%) | 28 (8.05%) |  |  |
| **Biphasic Sign** | 17 (19.54%) | 68 (19.54%) |  |  |
| **Fluid Leve** | 1 (1.15%) | 3 (0.86%) |  |  |
| **Black Hole Sign** | 1 (1.15%) | 1 (0.29%) |  |  |
| **Tracheotomy, (%)** |  |  | 0.01 (-0.22, 0.25) | 0.903 |
| **No** | 70 (80.46%) | 282 (81.03%) |  |  |
| **Yes** | 17 (19.54%) | 66 (18.97%) |  |  |

**TT: Tracheotomy, GCS: Glasgow Coma Scale, CT: Computed Tomography**
